# Supplementary material
Source: publisher site journal article supplement (https://static.cambridge.org/content/id/urn:cambridge.org:id:article:S0967199420000234/resource/name/S0967199420000234supp002.docx)
Supplement: Supplementary file 1 [file S0967199420000234supp002.docx]

**Supporting Information**


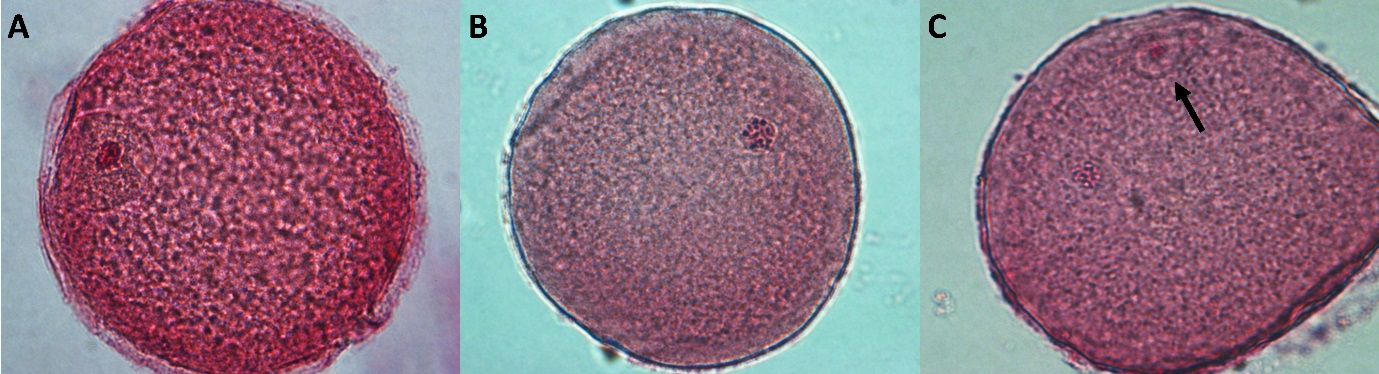


**Figure S1** Nuclear maturation stage of bovine oocytes, stained with 2% acetic orcein. The immature oocytes represented by vesicular germ stage (*A*) are characterized by the presence of a membrane around the chromosomes. After 12–15 h of cultivation there is a de-condensation of the group of chromosomes, which are distributed as small dots that together have a circular shape, characterizing metaphase I (*B*). Finally, in metaphase II (*C*), which in bovines can be observed after 18–24 h of cultivation, the chromosomes are also de-condensed, but the presence of polar body (black arrow) can be seen.
